# Supplementary material for: Clinical genomic profiling in the management of patients with soft tissue and bone sarcoma
Source: PubMed Central journal article supplement (PMC9200814; doi:10.1038/s41467-022-30496-0), 2022-06-15
Supplement: 41467_2022_30496_MOESM1_ESM.pdf [file 41467_2022_30496_MOESM1_ESM.pdf]

**Figure S1**

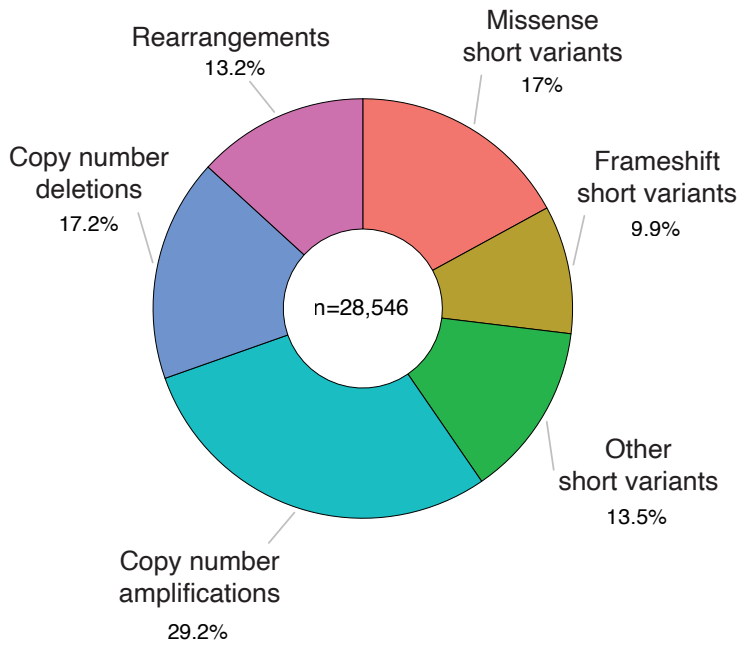

**Supplementary Figure S1. Distribution of classes of genomic alterations across all sarcomas.**

A single tumor specimen may harbor multiple types of gene alterations. A total of 28,724 known or likely pathogenic variants (11,600 non-synonymous single nucleotide variants [SNVs]/indels, 13,287 copy number alterations, and 3,837 rearrangements) were detected.

**Figure S2**

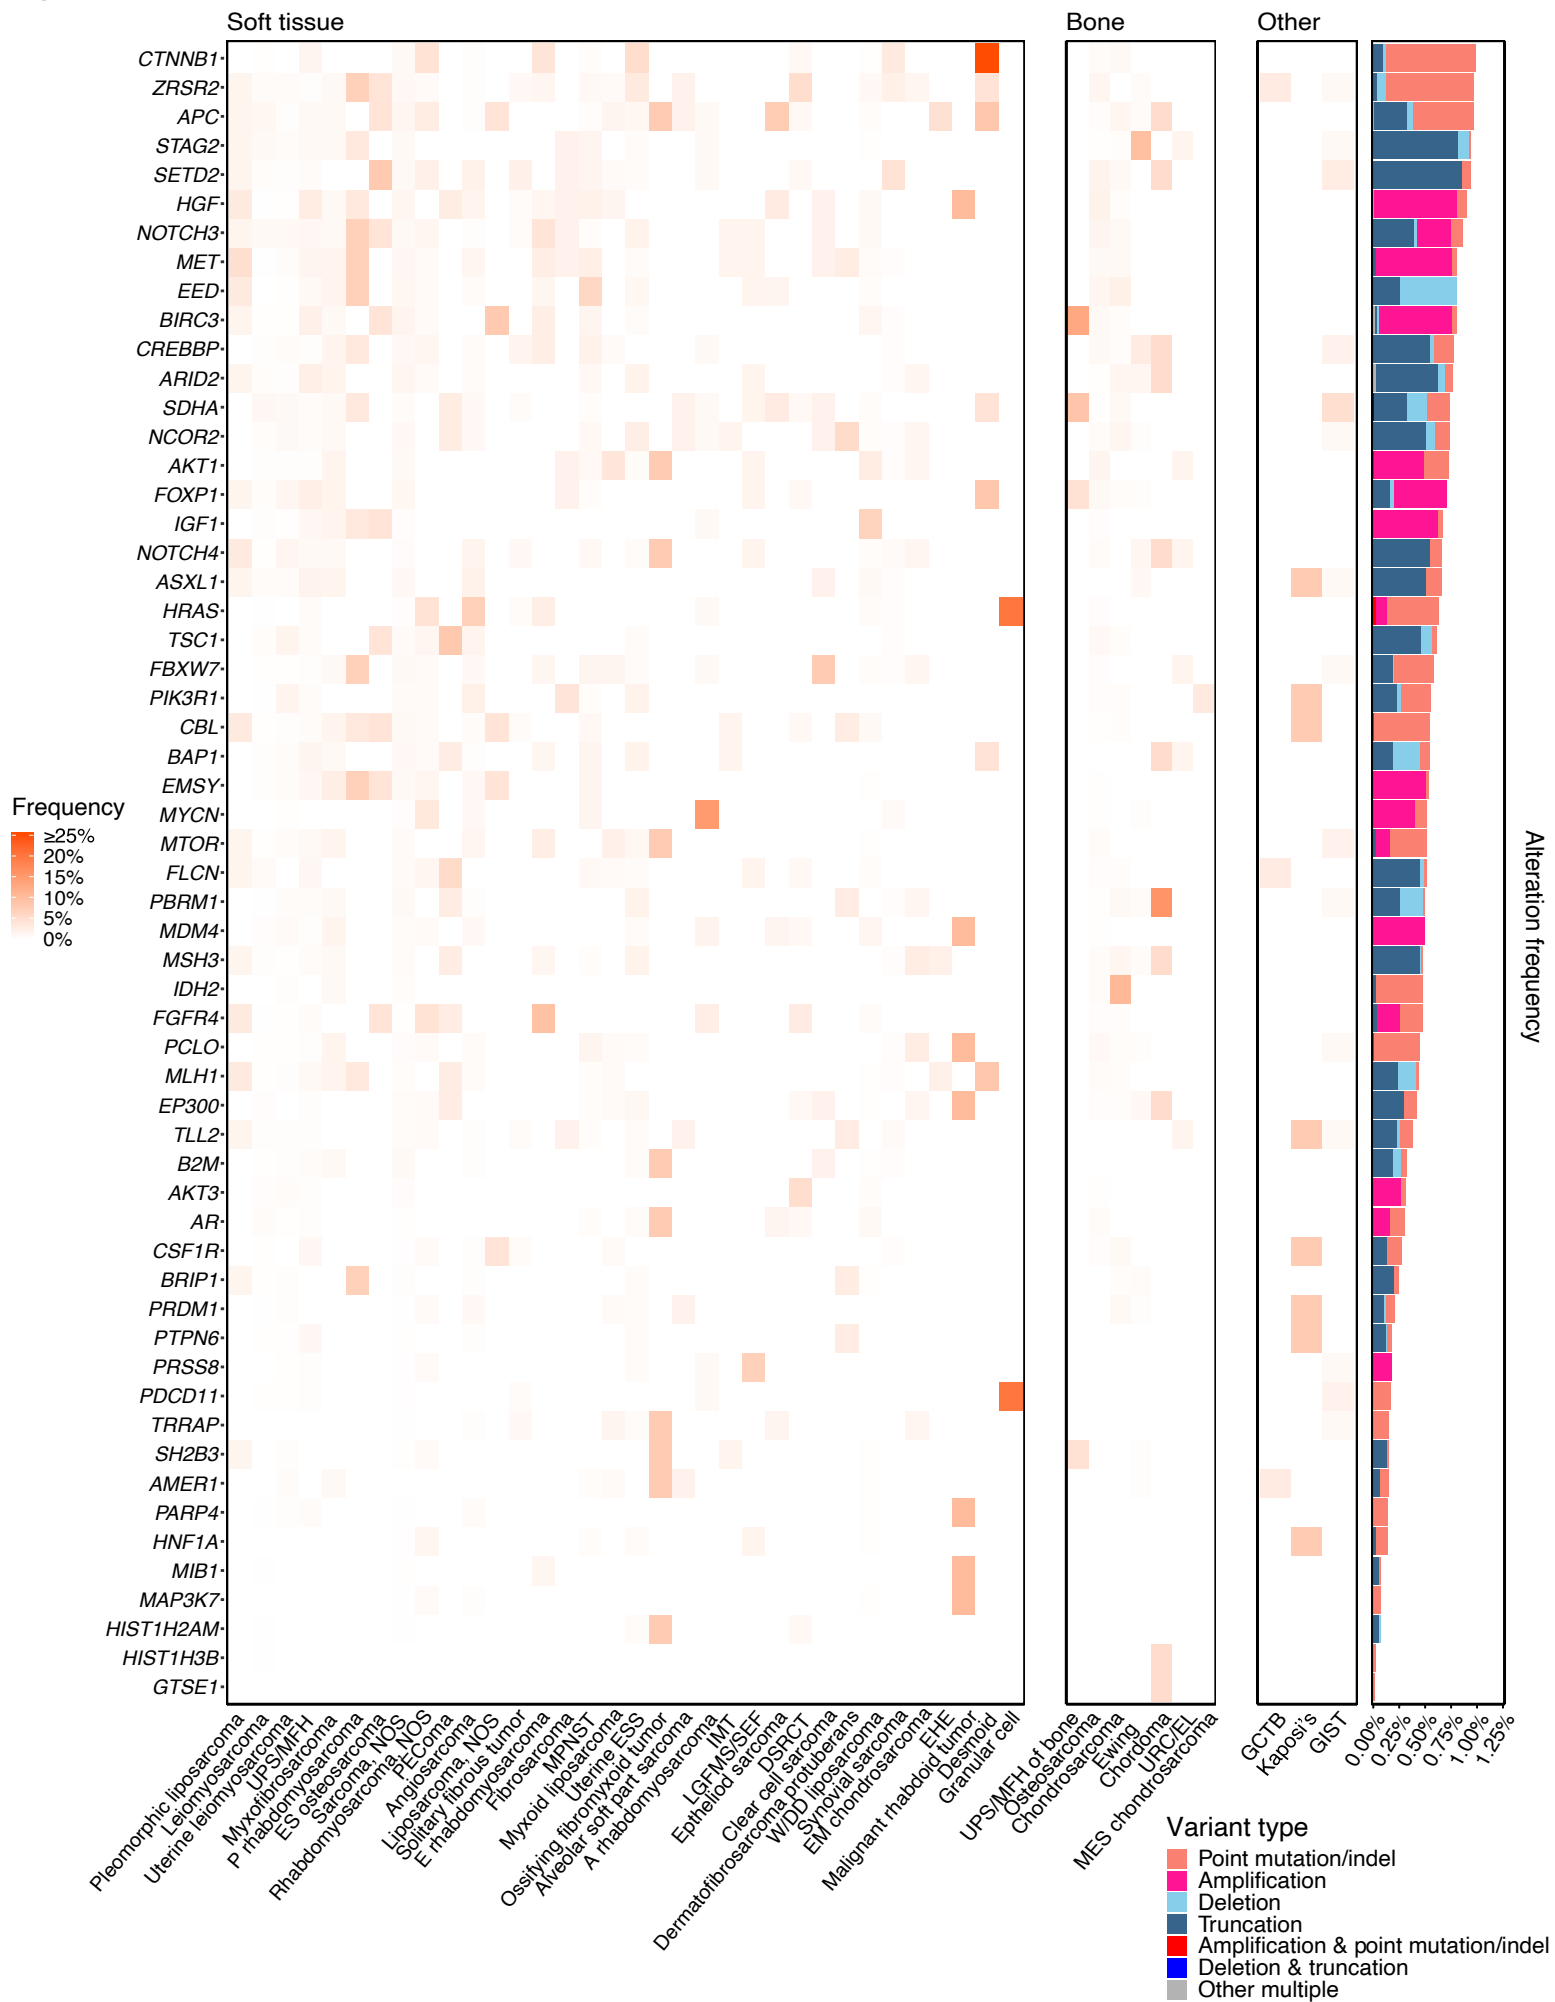

**Supplementary Figure S2. Heat map of recurrent somatic alterations across soft tissue, bone and other (GIST, Kaposi, giant cell tumor of bone, and rare) sarcomas.** Genes with alteration frequency of  $< 1\%$  in the total sarcoma cohort but  $\geq 5\%$  in any individual sarcoma subtype are listed along with the mechanisms of genetic alteration across tumor types. Right, percentage of cases with each type of genetic alteration.

**Figure S3**

**a**

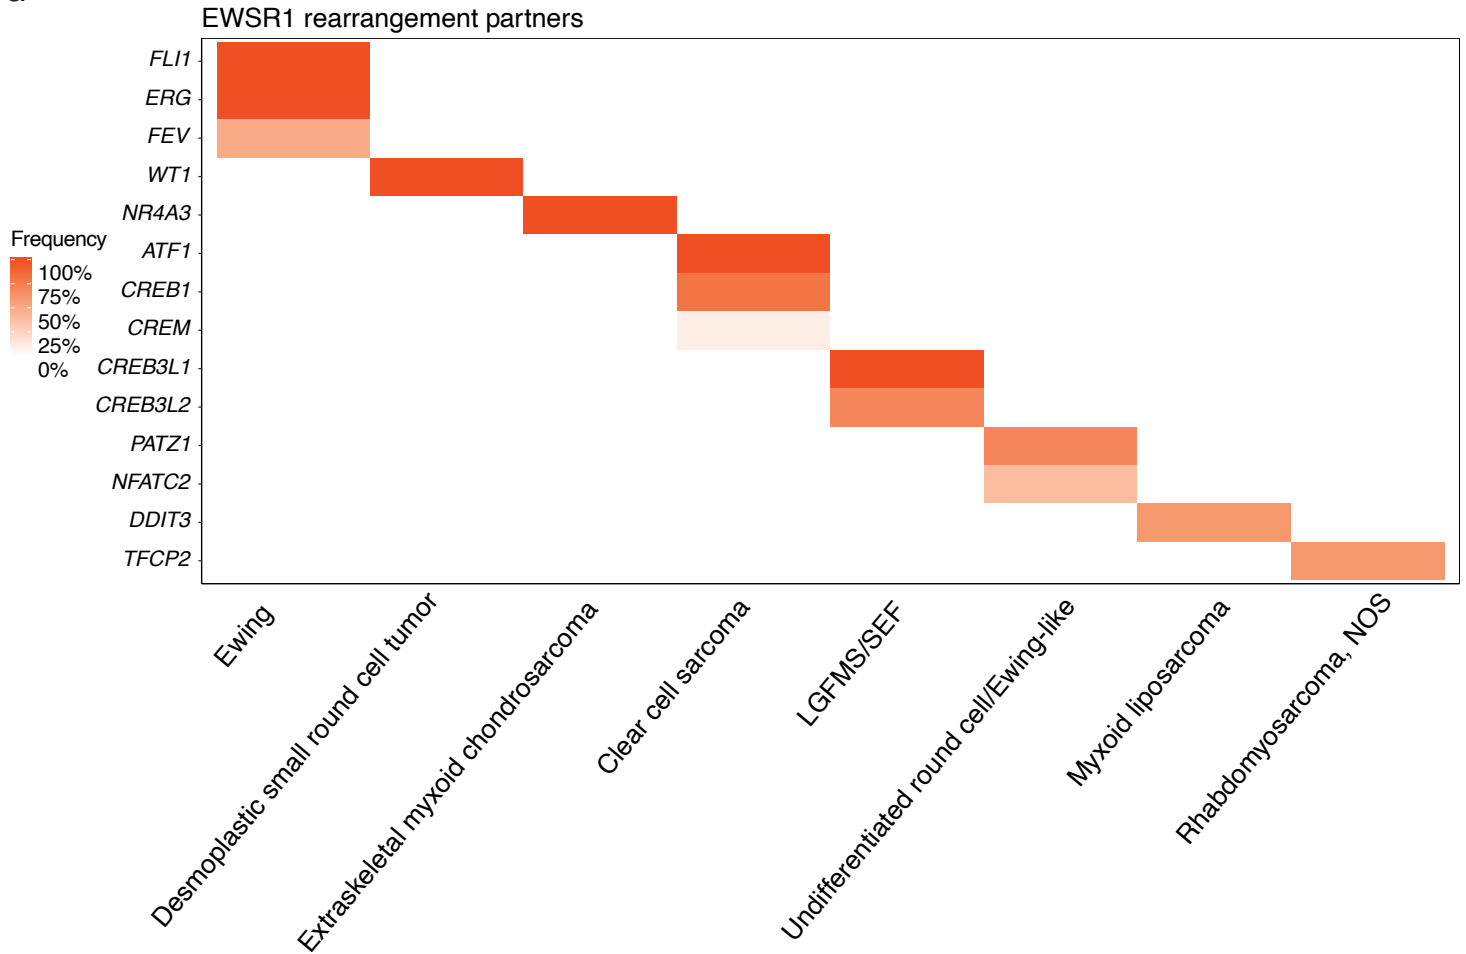

**b**

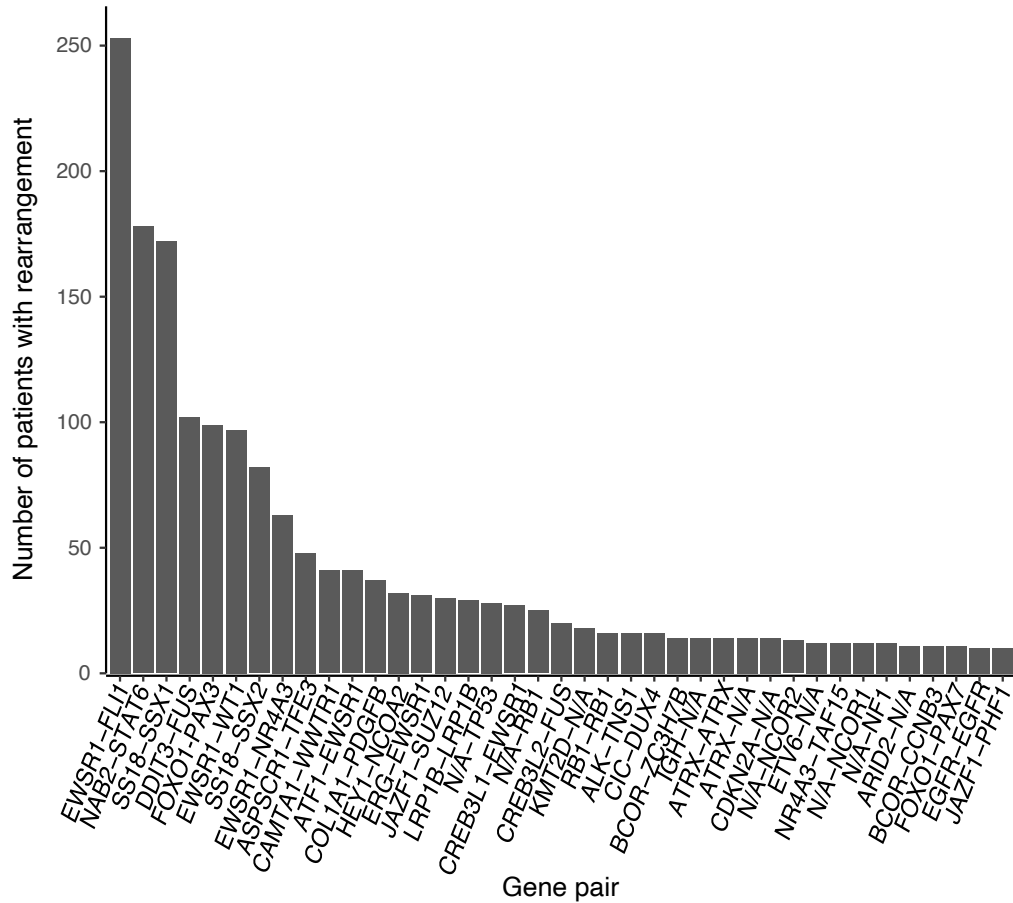

**Supplementary Figure S3. Gene fusions. (a) *EWSR1* fusion partners (b) Distribution and frequency of all rearrangements across all sarcomas analyzed.**

**Figure S4**

**a**

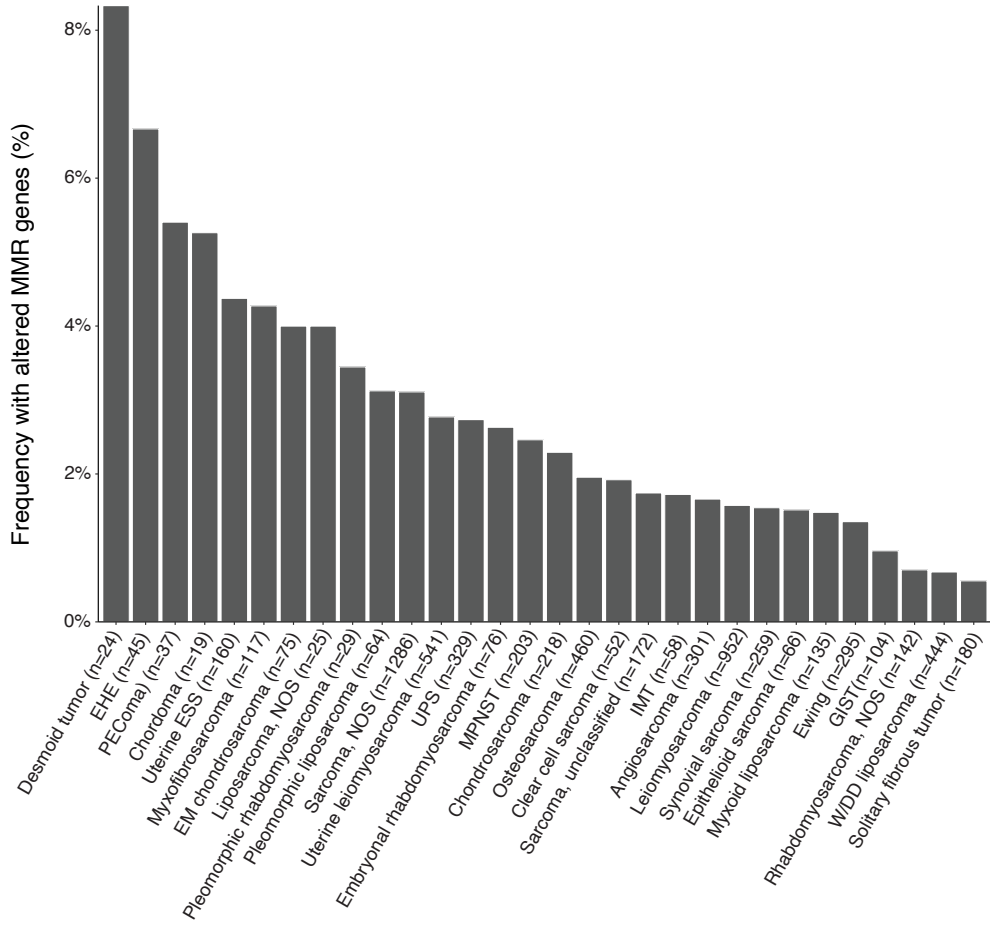

**b**

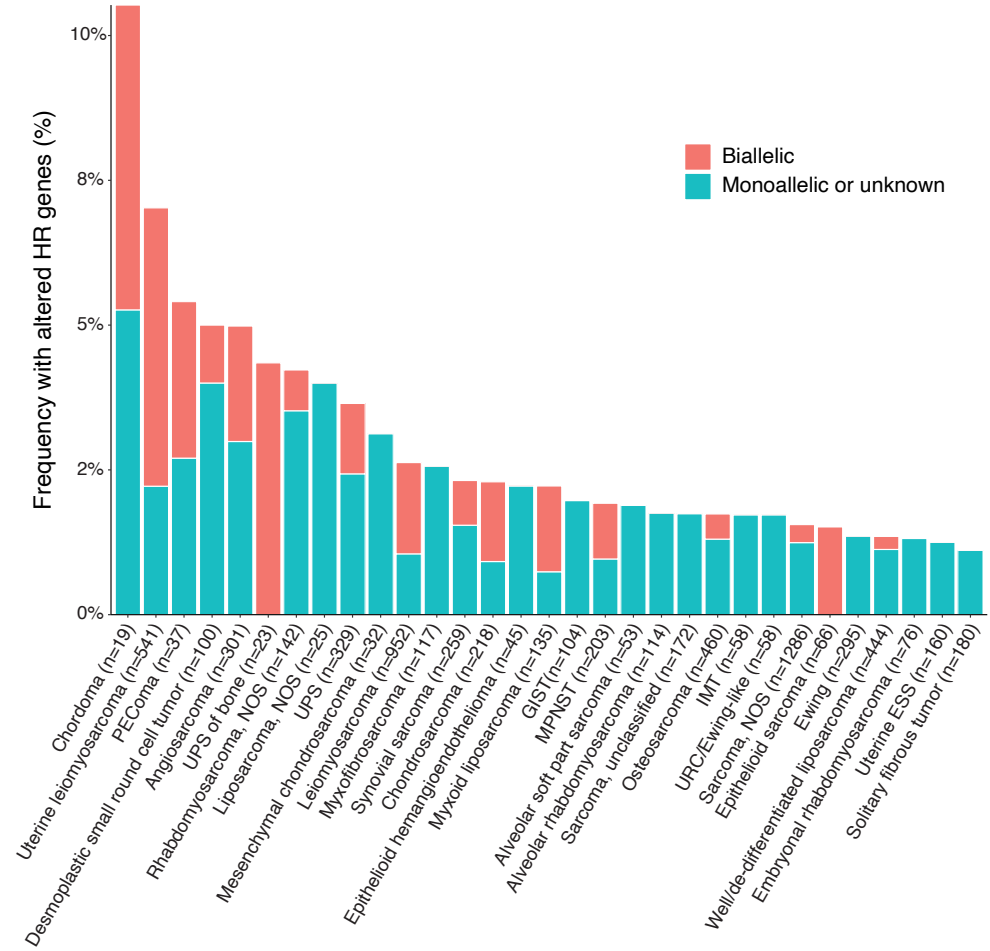

**Supplementary Figure S4. Alterations in mismatch repair and homologous**

**recombination. (a)** Distribution of the frequency of alterations in mismatch repair genes

(irrespective of allelic status) among sarcomas. **(b)** Distribution of the frequency of alterations in

homologous recombination genes among sarcomas.

**Figure S5**

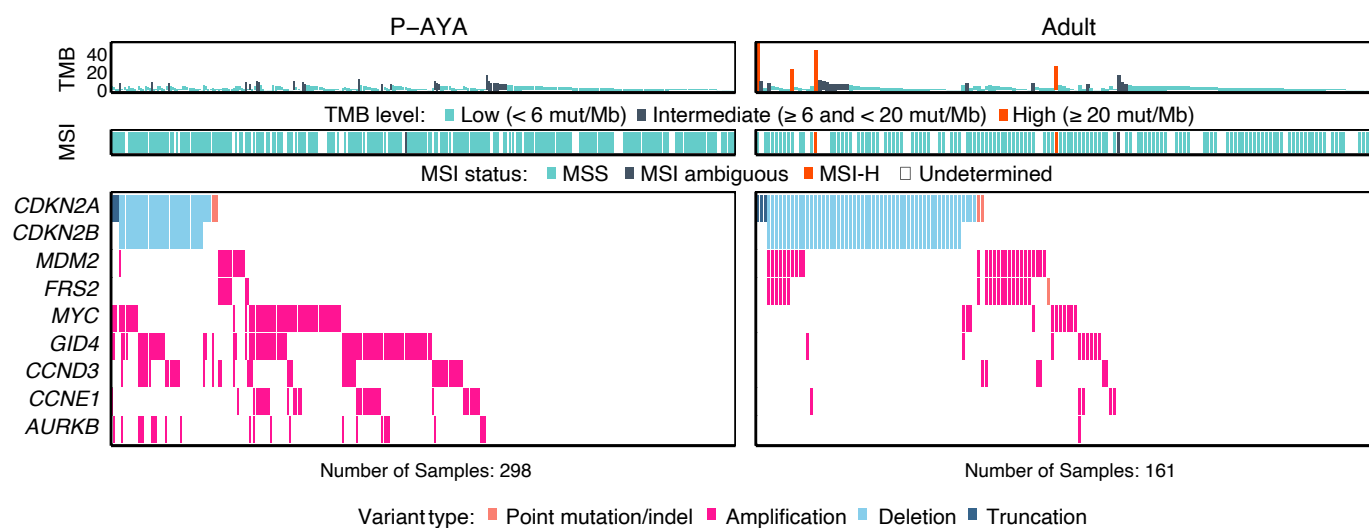

**Supplementary Figure S5. Oncoplot of genomic alterations in pediatric, adolescent, and young adult patients versus adult patients diagnosed with osteosarcoma.** Top row, tumor mutational burden (TMB) in mutations/Mb (mut/Mb). Pediatric and young adult (PAYA), ≤ 30 years of age; n = 298. Adults, n = 161.



**Figure S6**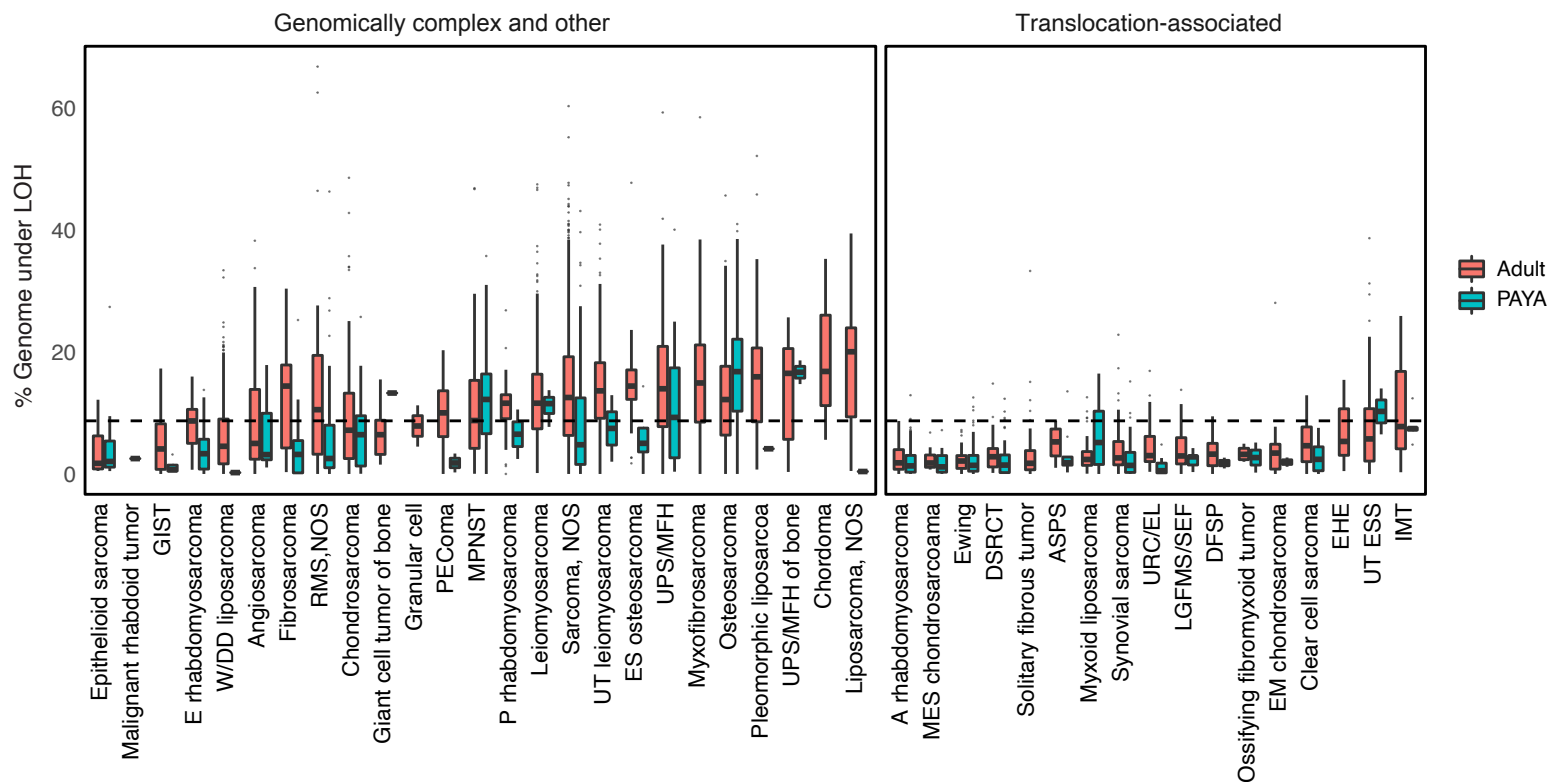

**Supplementary Figure S6. Comparison of genomic loss of heterozygosity (gLOH) between P-AYA and adult patients within each sarcoma histology.** gLOH only evaluable n = 4,619. The lower and upper boundary of the boxes represent the 25th and 75th percentiles; the line within the boxes represents the medians; whiskers extend to extreme values  $\leq 1.5 \times$  IQR; points beyond whiskers are outliers.

**Supplementary Table S1. Targeted sequencing gene set.** Exonic coverage (465 genes), intronic coverage (31 genes), and RNA sequencing coverage (333 genes).

| Exonic coverage: 465 genes |          |         |        |           |         |        |         |          |         |        |
|----------------------------|----------|---------|--------|-----------|---------|--------|---------|----------|---------|--------|
| ABL1                       | BTG2     | CSF3R   | FANCC  | GPR124    | JAK3    | MPL    | PASK    | RASGEF1A | SOCS3   | U2AF2  |
| ACTB                       | BTK      | CTCF    | FANCD2 | GRAF      | JARID2  | MRE11A | PAX5    | RB1      | SOX10   | VHL    |
| AKT1                       | BTLA     | CTNNA1  | FANCE  | GRIN2A    | JUN     | MSH2   | PBRM1   | REL      | SOX2    | WDR90  |
| AKT2                       | C11orf30 | CTNNB1  | FANCF  | GSK3B     | KDM2B   | MSH3   | PC      | RELN     | SPEN    | WHSC1  |
| AKT3                       | C17orf39 | CUL4A   | FANCG  | GTSE1     | KDM4C   | MSH6   | PCBP1   | RET      | SPOP    | WISP3  |
| ALK                        | CAD      | CUL4B   | FANCI  | HDAC1     | KDM5A   | MTOR   | PCLO    | RHOA     | SRC     | WT1    |
| ALOX12B                    | CARD11   | CUX1    | FANCL  | HDAC4     | KDM5C   | MUTYH  | PDCD1   | RICTOR   | SRSF2   | XBP1   |
| APC                        | CASP8    | CXCR4   | FANCM  | HDAC7     | KDM6A   | MYC    | PDCD11  | RMRP     | STAG2   | XPO1   |
| APCDD1                     | CBFB     | CYP17A1 | FAT3   | HGF       | KDR     | MYCL1  | PDGFRA  | RNF43    | STAT3   | XRCC3  |
| APH1A                      | CBL      | DAXX    | FBXO11 | HIST1H1C  | KEAP1   | MYCN   | PDGFRB  | ROS1     | STAT4   | YY1AP1 |
| AR                         | CCND1    | DDR2    | FBXO31 | HIST1H1D  | KIT     | MYD88  | PDK1    | RPA1     | STAT5A  | ZMYM3  |
| ARAF                       | CCND2    | DDX3X   | FBXW7  | HIST1H1E  | KLHL6   | MYO18A | PDL1    | RPL11    | STAT5B  | ZNF217 |
| ARFRP1                     | CCND3    | DIS3    | FGF10  | HIST1H2AC | KRAS    | MYST3  | PDL2    | RPL13    | STAT6   | ZNF703 |
| ARID1A                     | CCNE1    | DKC1    | FGF12  | HIST1H2AG | LEF1    | NBN    | PHF6    | RPL15    | STK11   | ZRSR2  |
| ARID2                      | CCT6B    | DNM2    | FGF14  | HIST1H2AL | LMO1    | NCOR1  | PIK3C2G | RPL35A   | SUFU    | ZSCAN3 |
| ASMTL                      | CD22     | DNMT3A  | FGF19  | HIST1H2AM | LRP1B   | NCOR2  | PIK3C3  | RPS14    | SUZ12   |        |
| ASXL1                      | CD36     | DOT1L   | FGF23  | HIST1H2BC | LRRK2   | NCSTN  | PIK3CA  | RPS19    | SYK     |        |
| ATM                        | CD58     | DTX1    | FGF3   | HIST1H2BJ | MAF     | NF1    | PIK3CG  | RPS26    | TAF1    |        |
| ATR                        | CD70     | DUSP2   | FGF4   | HIST1H2BK | MAFB    | NF2    | PIK3R1  | RPTOR    | TBL1XR1 |        |
| ATRX                       | CD79A    | DUSP9   | FGF6   | HIST1H2BO | MAGED1  | NFE2L2 | PIK3R2  | RUNX1    | TBX3    |        |
| AURKA                      | CD79B    | E2A     | FGF7   | HIST1H3B  | MALT1   | NFKBIA | PIM1    | S1PR2    | TCL1    |        |
| AURKB                      | CDC73    | EBF1    | FGFR1  | HLA-A     | MAP2K1  | NKX2-1 | PLCG2   | SBDS     | TET2    |        |
| AXIN1                      | CDH1     | ECT2L   | FGFR2  | HNF1A     | MAP2K2  | NOD1   | PMS2    | SDHA     | TGFBR2  |        |
| AXL                        | CDK12    | EED     | FGFR3  | HRAS      | MAP2K4  | NOTCH1 | PNRC1   | SDHB     | TIPARP  |        |
| B2M                        | CDK4     | EGFR    | FGFR4  | HSP90AA1  | MAP3K1  | NOTCH2 | POT1    | SDHC     | TLL2    |        |
| BACH1                      | CDK6     | ELP2    | FHIT   | ICK       | MAP3K13 | NOTCH3 | PPP2R1A | SDHD     | TMEM30A |        |
| BAP1                       | CDK8     | EP300   | FLCN   | ID3       | MAP3K14 | NOTCH4 | PRDM1   | SERP2    | TMSL3   |        |

|        |        |         |         |        |        |       |         |         |           |  |
|--------|--------|---------|---------|--------|--------|-------|---------|---------|-----------|--|
| BARD1  | CDKN1B | EPHA3   | FLT1    | IDH1   | MAP3K6 | NPM1  | PRKAR1A | SETBP1  | TNFAIP3   |  |
| BCL10  | CDKN2A | EPHA5   | FLT3    | IDH2   | MAP3K7 | NRAS  | PRKDC   | SETD2   | TNFRSF11A |  |
| BCL11B | CDKN2B | EPHA7   | FLT4    | IGF1   | MAPK1  | NSD1  | PRSS8   | SF3B1   | TNFRSF14  |  |
| BCL2   | CDKN2C | EPHB1   | FLYWCH1 | IGF1R  | MCL1   | NT5C2 | PTCH1   | SGK1    | TNFRSF17  |  |
| BCL2L2 | CEBPA  | ERBB2   | FOXL2   | IGF2   | MDM2   | NTRK1 | PTEN    | SH2B3   | TNFRSF6   |  |
| BCL6   | CHD2   | ERBB3   | FOXO1   | IKBKE  | MDM4   | NTRK2 | PTPN11  | SHIP    | TOP1      |  |
| BCL7A  | CHEK1  | ERBB4   | FOXO3   | IKZF1  | MED12  | NTRK3 | PTPN2   | SHP-1   | TP53      |  |
| BCOR   | CHEK2  | ERG     | FOXP1   | IKZF2  | MEF2B  | NUP93 | PTPRO   | SMAD2   | TP63      |  |
| BCORL1 | CHUK   | ESR1    | FRS2    | IKZF3  | MEF2C  | NUP98 | RAD21   | SMAD4   | TRAF2     |  |
| BIRC3  | CIC    | ETO     | GADD45B | IL7R   | MEN1   | P2RY8 | RAD50   | SMARCA1 | TRAF3     |  |
| BLM    | CIITA  | ETS1    | GATA1   | INHBA  | MET    | PAG1  | RAD51   | SMARCA4 | TRAF5     |  |
| BRAF   | CKS1B  | ETV6    | GATA2   | INPP4B | MIB1   | PAK3  | RAD51C  | SMARCB1 | TRRAP     |  |
| BRCA1  | CPS1   | EXOSC6  | GATA3   | IRF1   | MITF   | PAK7  | RAD51L1 | SMARCD1 | TSC1      |  |
| BRCA2  | CRBN   | EZH2    | GNA11   | IRF4   | MKI67  | PALB2 | RAD51L3 | SMC1A   | TSC2      |  |
| BRD4   | CREBBP | FAF1    | GNA12   | IRF8   | MLH1   | PARP1 | RAD52   | SMC3    | TSHR      |  |
| BRIP1  | CRKL   | FAM123B | GNA13   | IRS2   | MLL    | PARP2 | RAD54L  | SMO     | TUSC3     |  |
| BRSK1  | CRLF2  | FAM46C  | GNAQ    | JAK1   | MLL2   | PARP3 | RAF1    | SOCS1   | TYK2      |  |
| BTG1   | CSF1R  | FANCA   | GNAS    | JAK2   | MLL3   | PARP4 | RARA    | SOCS2   | U2AF1     |  |

| Intronic coverage: 31 genes |       |       |      |       |     |      |        |        |         |     |
|-----------------------------|-------|-------|------|-------|-----|------|--------|--------|---------|-----|
| ALK                         | BCR   | CRLF2 | ETV1 | ETV6  | IGH | JAK1 | MYC    | PDGFRB | RET     | TRG |
| BCL2                        | BRAF  | EGFR  | ETV4 | EWSR1 | IGK | JAK2 | NTRK1  | RAF1   | ROS1    |     |
| BCL6                        | CCND1 | EPOR  | ETV5 | FGFR2 | IGL | MLL  | PDGFRA | RARA   | TMPRSS2 |     |

**RNA sequencing coverage: 333 genes**

|          |         |        |          |        |        |         |         |           |
|----------|---------|--------|----------|--------|--------|---------|---------|-----------|
| ABI1     | BTG1    | DEK    | FOXO4    | IRF4   | MSN    | PBX1    | RET     | TBL1XR1   |
| ABL1     | C1orf77 | DLEU2  | FOXP1    | ITK    | MTAP   | PCM1    | RHOH    | TCL1      |
| ABL2     | CAMTA1  | DNMT3A | FSTL3    | JAK1   | MTCP1  | PCSK7   | RNF213  | TCL6      |
| ACSL6    | CARS    | DUSP22 | FUS      | JAK2   | MUC1   | PDE4DIP | ROS1    | TEC       |
| AF10     | CBFA2T3 | E2A    | GAS7     | JAK3   | MYB    | PDGFB   | RPA1    | TET1      |
| AF6      | CBFB    | EGFR   | GLI1     | JAZF1  | MYC    | PDGFRA  | RPL13   | TFE3      |
| AFF1     | CBL     | EIF4A2 | GLIS2    | KDM4C  | MYH11  | PDGFRB  | RPL15   | TFG       |
| AFF4     | CCND1   | ELF4   | GMPS     | KDSR   | MYH9   | PDK1    | RPL22   | TFPT      |
| ALK      | CCND2   | ELL    | GPHN     | KIF5B  | MYST3  | PDL1    | RPL35A  | TFRC      |
| ARHGEF12 | CCND3   | ELN    | GRAF     | LASP1  | NACA   | PDL2    | RPN1    | TLX1      |
| ARID1A   | CD247   | EML4   | HDAC4    | LCK    | NCOA2  | PER1    | RPS14   | TLX3      |
| ARID1B   | CD70    | ENL    | HERPUD1  | LCP1   | NDRG1  | PGAM5   | RPS15   | TMPRSS2   |
| ARNT     | CDC73   | EP300  | HEY1     | LEF1   | NF1    | PHF1    | RPS19   | TNFRSF11A |
| ASXL1    | CDK6    | EPHA7  | HIP1     | LMO1   | NF2    | PICALM  | RPS26   | TNFSF9    |
| ATF1     | CDKN2A  | EPOR   | HIST1H1A | LMO2   | NFKB2  | PIK3R1  | RUNDC2A | TOP1      |
| ATG5     | CDX2    | EPS15  | HIST1H4I | LPP    | NFKBIE | PIK3R2  | RUNX1   | TP53      |
| ATIC     | CEBPA   | ERBB2  | HLF      | LTK    | NIN    | PIM1    | RUNX2   | TP63      |
| ATM      | CEP110  | ERG    | HMGA1    | LYL1   | NKX2-1 | PLAG1   | SEC31A  | TPM3      |
| ATR      | CHIC2   | ETO    | HMGA2    | MAF    | NOTCH1 | PML     | SEPT5   | TPM4      |
| ATXN1    | CHN1    | ETS1   | HOXA11   | MAFB   | NPM1   | POU2AF1 | SEPT6   | TRAF2     |
| AXL      | CIC     | ETV1   | HOXA13   | MAGEA5 | NR4A3  | PPP1CB  | SEPT9   | TRAF3     |
| BAP1     | CIITA   | ETV4   | HOXA3    | MALT1  | NSD1   | PRDM1   | SET     | TRAF5     |
| BCL10    | CKS1B   | ETV5   | HOXA9    | MAP3K7 | NTRK1  | PRDM16  | SH3GL1  | TRG       |
| BCL11A   | CLP1    | ETV6   | HOXC11   | MDS2   | NTRK2  | PRRX1   | SLC1A2  | TRIM24    |
| BCL11B   | CLTC    | EWSR1  | HOXC13   | MECOM  | NTRK3  | PSIP1   | SMARCB1 | TRIP11    |
| BCL2     | CLTCL1  | FBXW7  | HOXD11   | MEF2C  | NUMA1  | PTCH1   | SRSF3   | TSC1      |
| BCL3     | COL1A1  | FCGR2B | HOXD13   | MKL1   | NUP214 | PTEN    | SS18    | TSC2      |
| BCL6     | CREB3L1 | FCRL4  | HSP90AA1 | MKL2   | NUP98  | PTK7    | SSX1    | TTL       |
| BCL7A    | CREB3L2 | FEV    | HSP90AB1 | MLF1   | NUTM2A | RABEP1  | SSX2    | TYK2      |

|       |        |         |       |       |          |          |       |         |
|-------|--------|---------|-------|-------|----------|----------|-------|---------|
| BCL8  | CREBBP | FGFR1   | IGH   | MLL   | OLIG2    | RAF1     | SSX4  | USP6    |
| BCL9  | CRLF2  | FGFR1OP | IGK   | MLLT3 | OMD      | RALGDS   | STAT6 | WHSC1   |
| BCOR  | CSF1   | FGFR2   | IGL   | MLLT6 | P2RY8    | RANBP17  | STK11 | WHSC1L1 |
| BCR   | CTNNB1 | FGFR3   | IKZF1 | MN1   | PAFAH1B2 | RAP1GDS1 | STL   | YPEL5   |
| BIRC3 | DDIT3  | FLI1    | IKZF3 | MNX1  | PALB2    | RARA     | SYK   | ZBTB16  |
| BRAF  | DDR1   | FNBP1   | IL21R | MSH2  | PAX3     | RB1      | TAF15 | ZMYM2   |
| BRCA1 | DDX10  | FOXO1   | IL3   | MSH6  | PAX5     | RBM15    | TAL1  | ZNF384  |
| BRCA2 | DDX6   | FOXO3   | INSR  | MSI2  | PAX7     | RCOR1    | TAL2  | ZNF521  |

**Table S2. Categorization of sarcoma types.**

| <b>Translocation-associated</b>                                    | <b>Genomically complex or other</b>                                         |
|--------------------------------------------------------------------|-----------------------------------------------------------------------------|
| Ewing                                                              | Undifferentiated pleomorphic sarcoma/malignant fibrous histiocytoma         |
| Solitary fibrous tumor                                             | Uterine leiomyosarcoma                                                      |
| Myxoid liposarcoma                                                 | Leiomyosarcoma                                                              |
| Mesenchymal chondrosarcoma                                         | Gastrointestinal stromal tumor                                              |
| Uterine endometrial stromal sarcoma                                | Well-differentiated/dedifferentiated liposarcoma                            |
| Undifferentiated round cell/Ewing-like                             | Osteosarcoma                                                                |
| Alveolar soft part sarcoma                                         | Embryonal rhabdomyosarcoma                                                  |
| Clear cell sarcoma                                                 | Sarcoma, NOS                                                                |
| Alveolar rhabdomyosarcoma                                          | Chondrosarcoma                                                              |
| Synovial sarcoma                                                   | Epithelioid sarcoma                                                         |
| Inflammatory myofibroblastic tumor                                 | Malignant peripheral nerve sheath tumor                                     |
| Extraskeletal myxoid chondrosarcoma                                | Pleomorphic liposarcoma                                                     |
| Epithelioid hemangioendothelioma                                   | Perivascular epithelioid cell tumor (PEComa)                                |
| Low-grade fibromyxoid sarcoma/ sclerosing epithelioid fibrosarcoma | Angiosarcoma                                                                |
| Desmoplastic small round cell tumor                                | Rhabdomyosarcoma, NOS                                                       |
| dermatofibrosarcoma protuberans                                    | Kaposi's sarcoma                                                            |
| Ossifying fibromyxoid tumor                                        | Fibrosarcoma                                                                |
|                                                                    | Myxofibrosarcoma                                                            |
|                                                                    | Giant cell tumor of bone                                                    |
|                                                                    | Extraskeletal osteosarcoma                                                  |
|                                                                    | Pleomorphic rhabdomyosarcoma                                                |
|                                                                    | Chordoma                                                                    |
|                                                                    | Liposarcoma, NOS                                                            |
|                                                                    | Undifferentiated pleomorphic sarcoma/malignant fibrous histiocytoma of bone |
|                                                                    | Rare sarcoma                                                                |
|                                                                    | Desmoid                                                                     |
|                                                                    | Malignant rhabdoid tumor                                                    |
|                                                                    | Granular cell                                                               |

**Table S3. Subtype reclassifications based on genomic data.** Any of the listed alterations was sufficient reason for reclassification. (P) presence; (A) absence (A).

| <b>From</b>                         | <b>To</b>                                                         | <b>Counts altered</b> | <b>Genomic basis</b>                                                                                                        |
|-------------------------------------|-------------------------------------------------------------------|-----------------------|-----------------------------------------------------------------------------------------------------------------------------|
| Osteosarcoma                        | Mesenchymal chondrosarcoma                                        | 5                     | (P): <i>HEY1-NCOA2</i>                                                                                                      |
| Osteosarcoma                        | Synovial sarcoma                                                  | 2                     | (P): <i>SSX18-SSX1/2/4</i>                                                                                                  |
| Osteosarcoma                        | Low-grade fibromyxoid sarcoma/sclerosing epithelioid fibrosarcoma | 2                     | (P): <i>EWSR1-CRB3L1/2</i>                                                                                                  |
| Dermatofibrosarcoma protuberans     | Sarcoma, unclassified                                             | 7                     | (A): <i>COL1A1-PDGFB</i>                                                                                                    |
| Dermatofibrosarcoma protuberans     | Solitary fibrous tumor                                            | 1                     | (P): <i>NAB2-STAT6</i>                                                                                                      |
| Uterine endometrial stromal sarcoma | Rhabdomyosarcoma, NOS                                             | 1                     | (P): <i>FOXO1-FGFR1, PAX3-NCOA1, PAX3-NCOA2, EWSR1-TFCP2, MEIS1-NCOA2, or NAB2-PDGFRB</i>                                   |
| Chondrosarcoma                      | Mesenchymal chondrosarcoma                                        | 24                    | (P): <i>HEY1-NCOA2</i>                                                                                                      |
| Chondrosarcoma                      | Extraskeletal myxoid chondrosarcoma                               | 68                    | (P): <i>NR4A3 with EWSR1, FUS, TAF15, TCF12, or TFG</i>                                                                     |
| Chondrosarcoma                      | Sarcoma, NOS                                                      | 1                     | (P): <i>EWSR1-CREM or NAB2-PDGFRB</i>                                                                                       |
| Chondrosarcoma                      | Undifferentiated round cell sarcoma/Ewing-like                    | 1                     | (P): <i>BCOR-CCNB3, CIC-DUX4, CIC-DUX4L10, CIC-FOXO4, EWSR1-SMARCA5, EWSR1-NFATC2, CIC-DUX4L-BCOR-MAML3, or EWSR1-PATZ1</i> |
| Chondrosarcoma                      | Myxoid liposarcoma                                                | 2                     | (P): <i>DDIT3-EWSR1 or DDIT3-FUS</i>                                                                                        |
| Chondrosarcoma                      | Solitary fibrous tumor                                            | 1                     | (P): <i>NAB2-STAT6</i>                                                                                                      |
| Rare sarcoma                        | Extraskeletal myxoid chondrosarcoma                               | 2                     | (P): <i>NR4A3 with EWSR1, FUS, TAF15, TCF12, or TFG</i>                                                                     |

|              |                                                                   |    |                                                                                                                             |
|--------------|-------------------------------------------------------------------|----|-----------------------------------------------------------------------------------------------------------------------------|
| Rare sarcoma | Undifferentiated round cell sarcoma/Ewing-like                    | 2  | (P): <i>BCOR-CCNB3, CIC-DUX4, CIC-DUX4L10, CIC-FOXO4, EWSR1-SMARCA5, EWSR1-NFATC2, CIC-DUX4L-BCOR-MAML3, or EWSR1-PATZ1</i> |
| Rare sarcoma | Ossifying fibromyxoid tumor                                       | 3  | (P): <i>PHF1-EP400 or PHF1-TFE3</i>                                                                                         |
| Rare sarcoma | Ewing                                                             | 1  | (P): <i>EWSR1 or FUS with ERG, ETV1/4, FEV, FLI1 or ERG</i>                                                                 |
| Rare sarcoma | Sarcoma, unclassified                                             | 13 | Withheld                                                                                                                    |
| Rare sarcoma | Rhabdomyosarcoma, NOS                                             | 1  | (P): <i>FOXO1-FGFR1, PAX3-NCOA1, PAX3-NCOA2, EWSR1-TFCP2, MEIS1-NCOA2, or NAB2-PDGFRB</i>                                   |
| Sarcoma, NOS | Extraskelatal myxoid chondrosarcoma                               | 4  | (P): <i>NR4A3 with EWSR1, FUS, TAF15, TCF12, or TFG</i>                                                                     |
| Sarcoma, NOS | Dermatofibrosarcoma protuberans                                   | 4  | (P): <i>COL1A1-PDGFB</i>                                                                                                    |
| Sarcoma, NOS | Inflammatory myofibroblastic tumor                                | 3  | (P): <i>EML4-ALK</i>                                                                                                        |
| Sarcoma, NOS | Undifferentiated round cell sarcoma/Ewing-like                    | 14 | (P): <i>BCOR-CCNB3, CIC-DUX4, CIC-DUX4L10, CIC-FOXO4, EWSR1-SMARCA5, EWSR1-NFATC2, CIC-DUX4L-BCOR-MAML3, or EWSR1-PATZ1</i> |
| Sarcoma, NOS | Synovial sarcoma                                                  | 24 | (P): <i>SSX18-SSX1/2/4</i>                                                                                                  |
| Sarcoma, NOS | Ossifying fibromyxoid tumor                                       | 2  | (P): <i>PHF1-EP400 or PHF1-TFE3</i>                                                                                         |
| Sarcoma, NOS | Ewing                                                             | 6  | (P): <i>EWSR1 or FUS with ERG, ETV1/4, FEV, FLI1 or ERG</i>                                                                 |
| Sarcoma, NOS | Alveolar soft part sarcoma                                        | 4  | (P): <i>ASPSCR1-TFE3</i>                                                                                                    |
| Sarcoma, NOS | Low-grade fibromyxoid sarcoma/sclerosing epithelioid fibrosarcoma | 21 | (P): <i>EWSR1-CRB3L1/2</i>                                                                                                  |
| Sarcoma, NOS | Alveolar rhabdomyosarcoma                                         | 2  | (P): <i>PAX3 or PAX7 with FOXO1 or FOXO4</i>                                                                                |
| Sarcoma, NOS | Rhabdomyosarcoma, NOS                                             | 2  | (P): <i>FOXO1-FGFR1, PAX3-NCOA1, PAX3-NCOA2, EWSR1-TFCP2, MEIS1-NCOA2, NAB2-PDGFRB</i>                                      |



|                                  |                                                                   |     |                                                                                                                                                                           |
|----------------------------------|-------------------------------------------------------------------|-----|---------------------------------------------------------------------------------------------------------------------------------------------------------------------------|
| Sarcoma, NOS                     | Myxoid liposarcoma                                                | 4   | (P): <i>DDIT3-EWSR1</i> or <i>DDIT3FUS</i>                                                                                                                                |
| Sarcoma, NOS                     | Desmoplastic small round cell tumor                               | 6   | (P): <i>EWSR1-WT1</i>                                                                                                                                                     |
| Sarcoma, NOS                     | Solitary fibrous tumor                                            | 30  | (P): <i>NAB2-STAT6</i>                                                                                                                                                    |
| Epithelioid hemangioendothelioma | Sarcoma, unclassified                                             | 25  | (A): <i>WWTR1-CAMTA1</i> or <i>YAP1-TFE3</i>                                                                                                                              |
| Leiomyosarcoma                   | Mesenchymal chondrosarcoma                                        | 1   | (P): <i>HEY1-NCOA2</i>                                                                                                                                                    |
| Leiomyosarcoma                   | Dermatofibrosarcoma protuberans                                   | 1   | (P): <i>COL1A1-PDGFB</i>                                                                                                                                                  |
| Leiomyosarcoma                   | Inflammatory myofibroblastic tumor                                | 1   | (P): <i>ATIC-ALK, CARS-ALK, CLTC-ALK, EML4-ALK, FN1-ALK, LMNA-ALK, PPFIBP1-ALK, PRKAR1A-ALK, RANBP2-ALK, SEC31-ALK, TFG-ALK, TFG-ROS1, TPM3-ALK, TPM4-ALK, YWHAE-ROS1</i> |
| Leiomyosarcoma                   | Synovial sarcoma                                                  | 2   | (P): <i>SSX18-SSX1/2/4</i>                                                                                                                                                |
| Leiomyosarcoma                   | Solitary fibrous tumor                                            | 1   | (P): <i>NAB2-STAT6</i>                                                                                                                                                    |
| Liposarcoma, NOS                 | Well/de-differentiated liposarcoma                                | 129 | (P): <i>MDM2</i> amplification                                                                                                                                            |
| Liposarcoma, NOS                 | Myxoid liposarcoma                                                | 8   | (P): <i>DDIT3-EWSR1</i> or <i>DDIT3-FUS</i>                                                                                                                               |
| Epithelioid sarcoma              | Low-grade fibromyxoid sarcoma/sclerosing epithelioid fibrosarcoma | 1   | (P): <i>EWSR1-CRB3L1/2</i>                                                                                                                                                |
| Pleomorphic liposarcoma          | Well/de-differentiated liposarcoma                                | 11  | (P): <i>MDM2</i> amplification                                                                                                                                            |
| Angiosarcoma                     | Epithelioid hemangioendothelioma                                  | 1   | (P): <i>WWTR1-CAMTA1</i> or <i>YAP1-TFE3</i>                                                                                                                              |
| Angiosarcoma                     | Undifferentiated round cell sarcoma/Ewing-like                    | 1   | (P): <i>BCOR-CCNB3, CIC-DUX4, CIC-DUX4L10, CIC-FOXO4, EWSR1-SMARCA5, EWSR1-NFATC2, CIC-DUX4L-BCOR-MAML3, or EWSR1-PATZ1</i>                                               |
| Angiosarcoma                     | Synovial sarcoma                                                  | 1   | (P): <i>SSX18-SSX1/2/4</i>                                                                                                                                                |
| Synovial sarcoma                 | Undifferentiated round cell sarcoma/Ewing-like                    | 2   | (A): <i>SSX18-SSX1/2/4</i>                                                                                                                                                |

|                                              |                                                                   |    |                                                                                                                                                                                                                                                                                           |
|----------------------------------------------|-------------------------------------------------------------------|----|-------------------------------------------------------------------------------------------------------------------------------------------------------------------------------------------------------------------------------------------------------------------------------------------|
| Synovial sarcoma                             | Sarcoma, unclassified                                             | 44 | (A): <i>SSX18-SSX1/2/4</i>                                                                                                                                                                                                                                                                |
| Synovial sarcoma                             | Low-grade fibromyxoid sarcoma/sclerosing epithelioid fibrosarcoma | 2  | (A): <i>SSX18-SSX1/2/4</i>                                                                                                                                                                                                                                                                |
| Synovial sarcoma                             | Rhabdomyosarcoma, NOS                                             | 1  | (A): <i>SSX18-SSX1/2/4</i>                                                                                                                                                                                                                                                                |
| Synovial sarcoma                             | Solitary fibrous tumor                                            | 2  | (P): <i>NAB2-STAT6</i>                                                                                                                                                                                                                                                                    |
| Perivascular epithelioid cell tumor (pecoma) | Ewing                                                             | 1  | (P): <i>EWSR1</i> or <i>FUS</i> with <i>ERG</i> , <i>ETV1/4</i> , <i>FEV</i> , <i>FLI1</i> or <i>ERG</i>                                                                                                                                                                                  |
| Fibrosarcoma                                 | Dermatofibrosarcoma protuberans                                   | 5  | (P): <i>COL1A1-PDGFB</i>                                                                                                                                                                                                                                                                  |
| Fibrosarcoma                                 | Inflammatory myofibroblastic tumor                                | 2  | (P): <i>ATIC-ALK</i> , <i>CARS-ALK</i> , <i>CLTC-ALK</i> , <i>EML4-ALK</i> , <i>FN1-ALK</i> , <i>LMNA-ALK</i> , <i>PPFIBP1-ALK</i> , <i>PRKAR1A-ALK</i> , <i>RANBP2-ALK</i> , <i>SEC31-ALK</i> , <i>TFG-ALK</i> , <i>TFG-ROS1</i> , <i>TPM3-ALK</i> , <i>TPM4-ALK</i> , <i>YWHAE-ROS1</i> |
| Fibrosarcoma                                 | Synovial sarcoma                                                  | 1  | (P): <i>SSX18-SSX1/2/4</i>                                                                                                                                                                                                                                                                |
| Fibrosarcoma                                 | Low-grade fibromyxoid sarcoma/sclerosing epithelioid fibrosarcoma | 21 | (P): <i>EWSR1-CRB3L1/2</i>                                                                                                                                                                                                                                                                |
| Fibrosarcoma                                 | Solitary fibrous tumor                                            | 1  | (P): <i>NAB2-STAT6</i>                                                                                                                                                                                                                                                                    |
| Ewing                                        | Inflammatory myofibroblastic tumor                                | 1  | (P): <i>ATIC-ALK</i> , <i>CARS-ALK</i> , <i>CLTC-ALK</i> , <i>EML4-ALK</i> , <i>FN1-ALK</i> , <i>LMNA-ALK</i> , <i>PPFIBP1-ALK</i> , <i>PRKAR1A-ALK</i> , <i>RANBP2-ALK</i> , <i>SEC31-ALK</i> , <i>TFG-ALK</i> , <i>TFG-ROS1</i> , <i>TPM3-ALK</i> , <i>TPM4-ALK</i> , <i>YWHAE-ROS1</i> |
| Ewing                                        | Undifferentiated round cell sarcoma/Ewing-like                    | 14 | (P): <i>BCOR-CCNB3</i> , <i>CIC-DUX4</i> , <i>CIC-DUX4L10</i> , <i>CIC-FOXO4</i> , <i>EWSR1-SMARCA5</i> , <i>EWSR1-NFATC2</i> , <i>CIC-DUX4L-BCOR-MAML3</i> , or <i>EWSR1-PATZ1</i>                                                                                                       |
| Ewing                                        | Synovial sarcoma                                                  | 3  | (P): <i>SSX18-SSX1/2/4</i>                                                                                                                                                                                                                                                                |
| Ewing                                        | Sarcoma, unclassified                                             | 40 | (A): <i>EWSR1</i> or <i>FUS</i> with <i>ERG</i> , <i>ETV1/4</i> , <i>FEV</i> , <i>FLI1</i> or <i>ERG</i>                                                                                                                                                                                  |
| Ewing                                        | Desmoplastic small round cell tumor                               | 8  | (P): <i>EWSR1-WT1</i>                                                                                                                                                                                                                                                                     |

|                                                 |                                                                   |    |                                                                                                                                                                           |
|-------------------------------------------------|-------------------------------------------------------------------|----|---------------------------------------------------------------------------------------------------------------------------------------------------------------------------|
| Well/de-differentiated liposarcoma              | Pleomorphic liposarcoma                                           | 24 | (P): <i>MDM2</i> amplification                                                                                                                                            |
| Well/de-differentiated liposarcoma              | Solitary fibrous tumor                                            | 1  | (P): <i>NAB2-STAT6</i>                                                                                                                                                    |
| Undifferentiated pleomorphic sarcoma of bone    | Undifferentiated round cell sarcoma/Ewing-like                    | 1  | (P): <i>BCOR-CCNB3, CIC-DUX4, CIC-DUX4L10, CIC-FOXO4, EWSR1-SMARCA5, EWSR1-NFATC2, CIC-DUX4L-BCOR-MAML3, or EWSR1-PATZ1</i>                                               |
| Undifferentiated pleomorphic sarcoma of bone    | Ewing                                                             | 1  | (P): <i>EWSR1</i> or <i>FUS</i> with <i>ERG, ETV1/4, FEV, FLI1</i> or <i>ERG</i>                                                                                          |
| Undifferentiated pleomorphic sarcoma of bone    | Solitary fibrous tumor                                            | 1  | (P): <i>NAB2-STAT6</i>                                                                                                                                                    |
| Malignant peripheral nerve sheath tumor (mpnst) | Synovial sarcoma                                                  | 3  | (P): <i>SSX18-SSX1/2/4</i>                                                                                                                                                |
| Malignant peripheral nerve sheath tumor (mpnst) | Low-grade fibromyxoid sarcoma/sclerosing epithelioid fibrosarcoma | 1  | (P): <i>EWSR1-CRB3L1/2</i>                                                                                                                                                |
| Alveolar soft part sarcoma                      | Sarcoma, unclassified                                             | 11 | (A): <i>ASPSCR1-TFE3</i>                                                                                                                                                  |
| Alveolar soft part sarcoma                      | Low-grade fibromyxoid sarcoma/sclerosing epithelioid fibrosarcoma | 1  | (P): <i>EWSR1-CRB3L1/2</i><br>(A): <i>ASPSCR1-TFE3</i>                                                                                                                    |
| Uterine leiomyosarcoma                          | Dermatofibrosarcoma protuberans                                   | 2  | (P): <i>COL1A1-PDGFB</i>                                                                                                                                                  |
| Uterine leiomyosarcoma                          | Uterine endometrial stromal sarcoma                               | 3  | (P): <i>BCOR:ZC3H7B</i> (and uterus primary)                                                                                                                              |
| Uterine leiomyosarcoma                          | Inflammatory myofibroblastic tumor                                | 1  | (P): <i>ATIC-ALK, CARS-ALK, CLTC-ALK, EML4-ALK, FN1-ALK, LMNA-ALK, PPFIBP1-ALK, PRKAR1A-ALK, RANBP2-ALK, SEC31-ALK, TFG-ALK, TFG-ROS1, TPM3-ALK, TPM4-ALK, YWHAE-ROS1</i> |
| Uterine leiomyosarcoma                          | Solitary fibrous tumor                                            | 1  | (P): <i>NAB2-STAT6</i>                                                                                                                                                    |
| Undifferentiated pleomorphic sarcoma            | Mesenchymal chondrosarcoma                                        | 1  | (P): <i>HEY1-NCOA2</i>                                                                                                                                                    |

|                                      |                                                                   |   |                                                                                                                                                                           |
|--------------------------------------|-------------------------------------------------------------------|---|---------------------------------------------------------------------------------------------------------------------------------------------------------------------------|
| Undifferentiated pleomorphic sarcoma | Inflammatory myofibroblastic tumor                                | 2 | (P): <i>ATIC-ALK, CARS-ALK, CLTC-ALK, EML4-ALK, FN1-ALK, LMNA-ALK, PPFIBP1-ALK, PRKAR1A-ALK, RANBP2-ALK, SEC31-ALK, TFG-ALK, TFG-ROS1, TPM3-ALK, TPM4-ALK, YWHAE-ROS1</i> |
| Undifferentiated pleomorphic sarcoma | Undifferentiated round cell sarcoma/Ewing-like                    | 2 | (P): <i>BCOR-CCNB3, CIC-DUX4, CIC-DUX4L10, CIC-FOXO4, EWSR1-SMARCA5, EWSR1-NFATC2, CIC-DUX4L-BCOR-MAML3, or EWSR1-PATZ1</i>                                               |
| Undifferentiated pleomorphic sarcoma | Ewing                                                             | 2 | (P): <i>EWSR1 or FUS with ERG, ETV1/4, FEV, FLI1 or ERG</i>                                                                                                               |
| Undifferentiated pleomorphic sarcoma | Low-grade fibromyxoid sarcoma/sclerosing epithelioid fibrosarcoma | 1 | (P): <i>EWSR1-CRB3L1/2</i>                                                                                                                                                |
| Undifferentiated pleomorphic sarcoma | Rhabdomyosarcoma, NOS                                             | 1 | (P): <i>FOXO1-FGFR1, PAX3-NCOA1, PAX3-NCOA2, EWSR1-TFCP2, MEIS1-NCOA2, NAB2-PDGFRB</i>                                                                                    |
| Undifferentiated pleomorphic sarcoma | Desmoplastic small round cell tumor                               | 1 | (P): <i>EWSR1-WT1</i>                                                                                                                                                     |
| Undifferentiated pleomorphic sarcoma | Solitary fibrous tumor                                            | 2 | (P): <i>NAB2-STAT6</i>                                                                                                                                                    |
| Myxofibrosarcoma                     | Low-grade fibromyxoid sarcoma/sclerosing epithelioid fibrosarcoma | 4 | (P): <i>EWSR1-CRB3L1/2</i>                                                                                                                                                |
| Embryonal rhabdomyosarcoma           | Alveolar rhabdomyosarcoma                                         | 5 | (P): <i>PAX3 or PAX7 with FOXO1 or FOXO4</i>                                                                                                                              |
| Embryonal rhabdomyosarcoma           | Rhabdomyosarcoma, NOS                                             | 2 | (P): <i>FOXO1-FGFR1, PAX3-NCOA1, PAX3-NCOA2, EWSR1-TFCP2, MEIS1-NCOA2, or NAB2-PDGFRB</i>                                                                                 |
| Clear cell sarcoma                   | Ewing                                                             | 1 | (P): <i>EWSR1 or FUS with ERG, ETV1/4, FEV, FLI1 or ERG</i>                                                                                                               |
| Clear cell sarcoma                   | Sarcoma, unclassified                                             | 5 | (A): <i>EWSR1 and CREB1 or ATF1</i>                                                                                                                                       |
| Alveolar rhabdomyosarcoma            | Undifferentiated round cell sarcoma/Ewing-like                    | 1 | (P): <i>BCOR-CCNB3, CIC-DUX4, CIC-DUX4L10, CIC-FOXO4, EWSR1-SMARCA5, EWSR1-NFATC2, CIC-DUX4L-BCOR-MAML3, or EWSR1-PATZ1</i>                                               |

|                                     |                                                                   |    |                                                                   |
|-------------------------------------|-------------------------------------------------------------------|----|-------------------------------------------------------------------|
| Alveolar rhabdomyosarcoma           | Alveolar soft part sarcoma                                        | 1  | (P): <i>ASPSCR1-TFE3</i>                                          |
| Alveolar rhabdomyosarcoma           | Rhabdomyosarcoma, NOS                                             | 16 | (P): <i>PAX3</i> or <i>PAX7</i> with <i>FOXO1</i> or <i>FOXO4</i> |
| Alveolar rhabdomyosarcoma           | Desmoplastic small round cell tumor                               | 1  | (P): <i>EWSR1-WT1</i>                                             |
| Rhabdomyosarcoma, NOS               | Mesenchymal chondrosarcoma                                        | 1  | (P): <i>HEY1-NCOA2</i>                                            |
| Rhabdomyosarcoma, NOS               | Alveolar rhabdomyosarcoma                                         | 36 | (P): <i>PAX3</i> or <i>PAX7</i> with <i>FOXO1</i> or <i>FOXO4</i> |
| Myxoid liposarcoma                  | Extraskeletal myxoid chondrosarcoma                               | 1  | (P): <i>DDIT3-EWSR1</i> or <i>DDIT3-FUS</i>                       |
| Myxoid liposarcoma                  | Well/de-differentiated liposarcoma                                | 21 | (P): <i>DDIT3-EWSR1</i> or <i>DDIT3-FUS</i>                       |
| Desmoplastic small round cell tumor | Undifferentiated round cell sarcoma/Ewing-like                    | 2  | (P): <i>EWSR1-WT1</i>                                             |
| Desmoplastic small round cell tumor | Ossifying fibromyxoid tumor                                       | 1  | (P): <i>EWSR1-WT1</i>                                             |
| Desmoplastic small round cell tumor | Ewing                                                             | 1  | (P): <i>EWSR1-WT1</i>                                             |
| Desmoplastic small round cell tumor | Sarcoma, unclassified                                             | 7  | (P): <i>EWSR1-WT1</i>                                             |
| Solitary fibrous tumor              | Synovial sarcoma                                                  | 2  | (P): <i>SSX18-SSX1/2/4</i>                                        |
| Solitary fibrous tumor              | Sarcoma, unclassified                                             | 20 | (P): <i>NAB2-STAT6</i>                                            |
| Solitary fibrous tumor              | Low-grade fibromyxoid sarcoma/sclerosing epithelioid fibrosarcoma | 4  | (P): <i>EWSR1-CRB3L1/2</i>                                        |

---

**Table S4. Odd ratios of coincident alterations of two genes in the p53 or Rb pathways. P values determined by two-tailed Fisher's exact test; false discovery rate accounts for multiple hypothesis correction.**

| Gene1  | Gene2  | OR         | P value    | FDR        |
|--------|--------|------------|------------|------------|
| TP53   | MDM2   | 0.04767393 | 6.93E-130  | 3.46E-129  |
| TP53   | MDM4   | 0.2717202  | 0.00293975 | 0.00419964 |
| TP53   | CDKN2A | 0.83220995 | 0.00480173 | 0.00600216 |
| TP53   | CDKN2B | 0.68454764 | 2.96E-07   | 9.87E-07   |
| MDM2   | MDM4   | 3.69810845 | 0.00097421 | 0.00162368 |
| MDM2   | CDKN2A | 0.57544849 | 8.66E-07   | 2.16E-06   |
| MDM2   | CDKN2B | 0.60210064 | 5.49E-05   | 0.00010973 |
| CDKN2A | CDKN2B | 3975.82676 | 0          | 0          |
| RB1    | CDKN2A | 0.07003602 | 4.34E-80   | 7.81E-79   |
| RB1    | CDKN2B | 0.07001102 | 9.87E-61   | 1.18E-59   |
| RB1    | CDK4   | 0.04295226 | 2.86E-56   | 2.57E-55   |
| RB1    | CCND1  | 0.2042624  | 0.00148076 | 0.00332102 |
| RB1    | CCND2  | 0.23994812 | 0.0002073  | 0.00062189 |
| RB1    | CDK6   | 0.09541085 | 0.0012272  | 0.00315565 |
| CDKN2A | CDKN2B | 3975.82676 | 0          | 0          |
| CDKN2A | CDK4   | 0.3416311  | 1.32E-17   | 7.90E-17   |
| CDKN2A | CCNE1  | 0.32041248 | 1.46E-05   | 5.27E-05   |
| CDKN2A | CCND1  | 1.89567508 | 0.01798866 | 0.03083771 |
| CDKN2A | CCND2  | 1.76469653 | 0.01633936 | 0.02941085 |
| CDKN2A | CCND3  | 2.13548723 | 0.00016025 | 0.00052445 |
| CDKN2B | CDK4   | 0.36145797 | 5.97E-13   | 3.07E-12   |
| CDKN2B | CCNE1  | 0.40099169 | 0.00148176 | 0.00332102 |
| CDKN2B | CCND2  | 2.19009049 | 0.00156826 | 0.00332102 |
| CDKN2B | CCND3  | 2.15831743 | 0.00038619 | 0.00106945 |
| CDK4   | CCND1  | 6.07022344 | 1.12E-11   | 5.04E-11   |
| CDK4   | CCND2  | 8.9461642  | 3.44E-24   | 2.47E-23   |
| CDK4   | CCND3  | 3.96195862 | 4.55E-11   | 1.82E-10   |
| CCND2  | CCND3  | 3.44613194 | 0.01098392 | 0.02081164 |
| CCND3  | CDK6   | 6.25128205 | 0.00194769 | 0.00389538 |

**Table S5.** Demographics and sequencing characteristics of MSK cohort (n = 118).

|                                                                                       | n, %     | Median, range                            |
|---------------------------------------------------------------------------------------|----------|------------------------------------------|
| Age at diagnosis (years)                                                              |          | 50 (12–89)                               |
| <b>Gender</b>                                                                         |          |                                          |
| Male                                                                                  | 59 (50%) |                                          |
| Female                                                                                | 59 (50%) |                                          |
| <b>Stage at diagnosis (n = 118)</b>                                                   |          |                                          |
| Stage I                                                                               | 6 (5.1%) |                                          |
| Stage II                                                                              | 64 (54%) |                                          |
| Stage III                                                                             | 12 (10%) |                                          |
| Stage IV                                                                              | 36 (31%) |                                          |
| Number of systemic therapies administered for metastatic or locally recurrent disease |          | 4 (0-12)                                 |
| Number of surgeries                                                                   |          | 2 (0-9)                                  |
| Number of clinical trials enrolled per patient who went on systemic therapy           |          | 1 (0-5)                                  |
| <b>Histological subtypes</b>                                                          |          |                                          |
| <b>Soft tissue</b>                                                                    | 93 (79%) |                                          |
| Leiomyosarcoma                                                                        | 16 (14%) |                                          |
| Liposarcoma                                                                           | 15 (13%) |                                          |
| Dedifferentiated                                                                      | 12 (10%) |                                          |
| Myxoid                                                                                | 2 (1.7%) |                                          |
| Pleiomorphic                                                                          | 1 (0.8%) |                                          |
| Undifferentiated pleiomorphic sarcoma                                                 | 13 (11%) |                                          |
| Solitary fibrous tumor                                                                | 6 (5.1%) |                                          |
| PEComa                                                                                | 5 (4.2%) |                                          |
| Synovial sarcoma                                                                      | 5 (4.2%) |                                          |
| GIST                                                                                  | 4 (3.4%) |                                          |
| Angiosarcoma                                                                          | 4 (3.4%) |                                          |
| MPNST                                                                                 | 3 (2.5%) |                                          |
| Intimal sarcoma                                                                       | 3 (2.5%) |                                          |
| Other                                                                                 | 19 (16%) |                                          |
| <b>Bone</b>                                                                           | 25 (21%) |                                          |
| Chordoma                                                                              | 9 (7.6%) |                                          |
| Chondrosarcoma                                                                        | 9 (7.6%) |                                          |
| Osteosarcoma                                                                          | 6 (5.1%) |                                          |
| Ewing sarcoma                                                                         | 1 (0.8%) |                                          |
| <b>Sequencing Characteristics</b>                                                     |          |                                          |
| Time to Tumor sequencing from <b>initial diagnosis</b> , median (n = 106)             |          | 2.45 years<br><br>(Range 0 – 23.5 years) |

|                                                                                                                       |                                     |
|-----------------------------------------------------------------------------------------------------------------------|-------------------------------------|
| Time between <b>need/initiation of systemic therapy</b> and <b>consenting for genomic profiling</b> , median (n = 91) | 1.1 years<br>(Range 0 – 11.8 years) |
| Number of FM Reports per year (n = 118) <sup>***</sup> :                                                              |                                     |
| 2012                                                                                                                  | 9 (7.6%)                            |
| 2013                                                                                                                  | 54 (45.8%)                          |
| 2014                                                                                                                  | 40 (33.9%)                          |
| 2015                                                                                                                  | 14 (11.9%)                          |
| 2016                                                                                                                  | 1 (0.8%)                            |
| Sequencing Platform:                                                                                                  |                                     |
| v1                                                                                                                    | 13 (11%)                            |
| v2                                                                                                                    | 37 (31.4%)                          |
| v3                                                                                                                    | 19 (16.1%)                          |
| v4                                                                                                                    | 48 (40.7%)                          |
| v5                                                                                                                    | 1 (0.8%)                            |
| Success rate of tumor sequencing:                                                                                     |                                     |
| Successful                                                                                                            | 106 (91.0%)                         |
| Insufficient DNA or no alterations identified                                                                         | 12 (9.0%)                           |
| Tumor tissue sequenced (n = 106):                                                                                     |                                     |
| Primary                                                                                                               | 43 (40.6%)                          |
| Recurrence                                                                                                            | 22 (20.7%)                          |
| Metastatic                                                                                                            | 41 (38.7%)                          |
| Chronology of tumor sequencing (ratio*):                                                                              |                                     |
| Early (0 – 0.33)                                                                                                      | 30 (33.0%)                          |
| Intermediate (0.33 – 0.66)                                                                                            | 30 (33.0%)                          |
| Late (>0.66)                                                                                                          | 31 (34.0%)                          |



| Enrolled in <u>any</u> clinical trial ** |               |
|------------------------------------------|---------------|
| Early                                    | 18/30 (60.0%) |
| Intermediate                             | 17/30 (57.0%) |
| Late                                     | 18/31 (58.0%) |

\* Ratio between time from start of systemic therapy to sequencing/Time from start of systemic therapy to death or last alive.

\*\* Matched or unmatched clinical trials.

\*\*\*For failed/insufficient reports, date of notice of failure was used.

Three patients (Figure 6e, 6f and 6g) are not part of the initial 118 MSKCC patients and included to illustrate as anecdotal examples.

**Supplementary Table S6. Tumor characteristics and treatment of patients of 31 MSK patients matched to treatment based on targeted sequencing results.**

| Unique patients | Pathology          | Biomarker                             | Clinical trial or agent                                                                                                                                                  | Trial number                | PMID/PMC                 |
|-----------------|--------------------|---------------------------------------|--------------------------------------------------------------------------------------------------------------------------------------------------------------------------|-----------------------------|--------------------------|
| 1               | Sarcoma, NOS       | SMARCB1 del                           | A Phase II, Multicenter Study of the EZH2 Inhibitor Tazemetostat in Adult Subjects With INI1-Negative Tumors or Relapsed/Refractory Synovial Sarcoma and advanced cancer | <a href="#">NCT02601950</a> | 33035459                 |
| 2               | Myxoid Liposarcoma | PIK3CA G364R                          | An Open-Label, Phase Ib Dose Escalation Trial of Oral Combination Therapy with MSC1936369B and SAR245409 in Subjects with Locally Advanced or Metastatic Solid Tumors    | NCT01390818                 | <a href="#">30425349</a> |
| 3               | Sarcoma, NOS       | PIK3CA E545A                          | A Phase 1, Open-Label, Multiple-Escalating-Dose Study of DS-7423, an Orally Administered Dual PI3K/mTOR Inhibitor, in Subjects with Advanced Solid Tumors                | NCT01364844                 | <a href="#">29795308</a> |
| 4               | Intimal Sarcoma    | CDK4 amplification and RB1 wild-type  | A Phase 1 Multicenter, Open Label, Dose-escalation Study of Oral LEE011 in Patients with Advanced Solid Tumors or Lymphomas                                              | NCT01390818                 | 5621377                  |
| 4               | Intimal Sarcoma    | MDM2 amplification and TP53 wild-type | A Phase 1 Study to Assess the Safety, Tolerability, Pharmacokinetics, and Biological Activity of SAR405838 in Patients with Advanced Cancer                              | NCT01390818                 | <a href="#">27576846</a> |
| 5               | UPS/MFH            | CRKL amplification                    | Phase I Study of Dasatinib in Combination with Ipilimumab for Patients with Advanced Gastrointestinal Stromal Tumor and Other Sarcomas (NCI #9172)                       | NCT01643278                 | 28007774                 |
| 6               | Liposarcoma        | CDK4 amplification and RB1 wild-type  | A Phase II Study of PD0332991 in Patients with Advanced or Metastatic Sarcoma                                                                                            | NCT01209598                 | 23569312                 |
| 6               | Liposarcoma        | MDM2 amplification and TP53 wild-type | A Phase 1 Multiple Ascending Dose Study of DS3032b in Subjects With Advanced Solid Tumors or Lymphomas                                                                   | NCT01877382                 | ASCO 2018                |
| 7               | GIST               | KIT M552_W557del                      | Imatinib                                                                                                                                                                 | NA                          | NA                       |
| 8               | Chordoma           | MET amp                               | Crizotinib (Off-label use of FDA-approved)                                                                                                                               | NA                          | NA                       |
| 9               | Osteosarcoma       | CRKL amp                              | Dasatinib (Off -abel use of FDA-approved)                                                                                                                                | NA                          | NA                       |

|    |                       |                                       |                                                                                                                                             |             |                          |
|----|-----------------------|---------------------------------------|---------------------------------------------------------------------------------------------------------------------------------------------|-------------|--------------------------|
| 10 | Liposarcoma           | CDK4 amplification RB1 wild-type      | A Phase II Study of PD0332991 in Patients with Advanced or Metastatic Sarcoma                                                               | NCT01209598 | 23569312                 |
| 10 | Liposarcoma           | MDM2 amplification and TP53 wild-type | A Phase 1 Study to Assess the Safety, Tolerability, Pharmacokinetics, and Biological Activity of SAR405838 in Patients with Advanced Cancer | NCT01390818 | <a href="#">27576846</a> |
| 11 | Liposarcoma           | CDK4 amplification and RB1 wild-type  | A Phase II Study of PD0332991 in Patients with Advanced or Metastatic Liposarcoma                                                           | NCT01209598 | 23569312                 |
| 11 | Liposarcoma           | MDM2 amplification and TP53 wild-type | A Phase 1 Study to Assess the Safety, Tolerability, Pharmacokinetics, and Biological Activity of SAR405838 in Patients with Advanced Cancer | NCT01390818 | <a href="#">27576846</a> |
| 12 | Leiomyosarcoma/PEComa | TSC2 alteration                       | A Phase 1 First-in-Human Dose Study of LY3023414 an Oral PI3K/mTOR Dual Inhibitor in advanced tumors                                        | NCT01655225 | 29636360                 |
| 13 | Chordoma              | MDM2 amplification and TP53 wild-type | A Phase 1 Multiple Ascending Dose Study of DS3032b in Subjects With Advanced Solid Tumors or Lymphomas                                      | NCT01877382 | ASCO 2018                |
| 14 | Liposarcoma           | CDK4 amplification and RB1 wild-type  | A Phase II Study of PD0332991 in Patients with Advanced or Metastatic Liposarcoma                                                           | NCT01209598 | 23569312                 |
| 15 | Leiomyosarcoma        | CDK4 amplification RB1 wild-type      | Palbociclib (off-label, FDA-approved drug)                                                                                                  | NA          | NA                       |

|    |                                        |             |                                                                                                                                                                                                                                                        |                             |          |
|----|----------------------------------------|-------------|--------------------------------------------------------------------------------------------------------------------------------------------------------------------------------------------------------------------------------------------------------|-----------------------------|----------|
| 16 | Chondrosarcoma                         | IDH1 R132C  | A Phase 1, Multicenter, Open-Label, Dose Escalation and Expansion, Safety, Pharmacokinetic, Pharmacodynamic, and Clinical Activity Study of Orally Administered AG-120 in Subjects with Advanced Solid Tumors, Including Glioma, with an IDH1 Mutation | NCT02073994                 | 32208957 |
| 17 | Myoepithelial carcinoma of soft tissue | SMARCB1 del | <a href="#">A Phase II, Multicenter Study of the EZH2 Inhibitor Tazemetostat in Adult Subjects With INI1-Negative Tumors or Relapsed/Refractory Synovial Sarcoma and advanced cancer</a>                                                               | <a href="#">NCT02601950</a> | 33035459 |
| 18 | MPNST                                  | BRAF V600E  | Dabrafenib and Trametinib (Off label use of FDA approved drug, treated at outside hospital with no detailed records)                                                                                                                                   | NA                          | NA       |

|    |                |                                      |                                                                                                                                                                                                                                                        |             |          |
|----|----------------|--------------------------------------|--------------------------------------------------------------------------------------------------------------------------------------------------------------------------------------------------------------------------------------------------------|-------------|----------|
| 19 | Chondrosarcoma | IDH1 R132C                           | A Phase 1, Multicenter, Open-Label, Dose Escalation and Expansion, Safety, Pharmacokinetic, Pharmacodynamic, and Clinical Activity Study of Orally Administered AG-120 in Subjects with Advanced Solid Tumors, Including Glioma, with an IDH1 Mutation | NCT02073994 | 32208957 |
| 20 | GIST           | KIT D820V                            | Sunitinib (first line, off-label use of FDA approved drug)                                                                                                                                                                                             | NA          | NA       |
| 21 | MPNST          | NTRK3-TPM4 fusion                    | A Phase 2 Basket Study of the Oral TRK Inhibitor larotrectinib in Subjects with NTRK Fusion-Positive Tumors                                                                                                                                            | NCT02576431 | 29466156 |
| 22 | Liposarcoma    | CDK4 amplification and RB1 wild-type | A Phase II Study of PD0332991 in Patients with Advanced or Metastatic Liposarcoma                                                                                                                                                                      | NCT01209598 | 23569312 |
| 22 | Liposarcoma    | CDK4 amplification and RB1 wild-type | A Phase II Study of PD0332991 in Patients with Advanced or Metastatic Liposarcoma                                                                                                                                                                      | NCT01209598 | 23569312 |
| 23 | PEComa         | TSC2 Q1605                           | Sirolimus (off-label, FDA approved)                                                                                                                                                                                                                    | NA          | NA       |

|    |                                   |                                       |                                                                                                                                                                                                         |             |                          |
|----|-----------------------------------|---------------------------------------|---------------------------------------------------------------------------------------------------------------------------------------------------------------------------------------------------------|-------------|--------------------------|
| 24 | Follicular Dendritic Cell Sarcoma | FGFR3                                 | A Randomized Discontinuation Study of Brivanib Alaninate (BMS-582664) Versus Placebo in Subjects with Advanced Tumors                                                                                   | NCT00633789 | 31522033                 |
| 24 | Follicular Dendritic Cell Sarcoma | FGFR3                                 | A Phase I, Gene Alteration-Based, Open Label, Multicenter Study of Oral Debio1347 (CH5183284) in Patients with Advanced Solid Malignancies, Whose Tumors Have an Alteration of the FGFR 1, 2 or 3 Genes | NCT01948297 | Unpublished              |
| 25 | Chondrosarcoma                    | CDKN2A/B deletion                     | A Phase 1 Multicenter, Open Label, Dose-escalation Study of Oral LEE011 in Patients with Advanced Solid Tumors or Lymphomas                                                                             | NCT01237236 | <a href="#">27542767</a> |
| 26 | Intimal Sarcoma                   | MDM2 amplification and TP53 wild-type | A Phase 1 Multiple Ascending Dose Study of DS3032b in Subjects With Advanced Solid Tumors or Lymphomas                                                                                                  | NCT01877382 | ASCO 2018                |
| 26 | Intimal Sarcoma                   | CDK4 amplification and RB1 wild-type  | Palbociclib (off label, FDA approved)                                                                                                                                                                   | NA          | NA                       |
| 27 | Liposarcoma                       | MDM2                                  | A Phase 1 Multiple Ascending Dose Study of DS3032b in Subjects With Advanced Solid Tumors or Lymphomas                                                                                                  | NCT01877382 | ASCO 2018                |
| 28 | Chordoma                          | CDKN2A/B del                          | Palbociclib (off label, FDA approved)                                                                                                                                                                   | NA          | NA                       |
| 29 | Leiomyosarcoma                    | TSC2 truncation                       | Everolimus (off label, FDA approved)                                                                                                                                                                    | NA          | NA                       |

|    |             |                                       |                                                                                                                                                                         |             |                          |
|----|-------------|---------------------------------------|-------------------------------------------------------------------------------------------------------------------------------------------------------------------------|-------------|--------------------------|
| 30 | Liposarcoma | CDK4 amplification and RB1 wild-type  | A Phase II Study of PD0332991 in Patients with Advanced or Metastatic Liposarcoma                                                                                       | NCT01209598 | 23569312                 |
| 30 | Liposarcoma | MDM2 amplification and TP53 wild-type | A Phase 1 Study to Assess the Safety, Tolerability, Pharmacokinetics, and Biological Activity of SAR405838 in Patients with Advanced Cancer                             | NCT01390818 | <a href="#">27576846</a> |
| 31 | Liposarcoma | MDM2 amplification and TP53 wild-type | A Phase I, Open Label, Multicenter, Dose-escalation Study of Oral HDM201 in Adult Patients with Advanced Solid and Hematological Tumors Characterized by Wild-type TP53 | NCT02143635 | Unpublished              |

Note: patients with more than 1 biomarker enrolled to different trials were only counted once.
